# Supplementary material for: RNA-Seq Time Series of Vitis vinifera Bud Development Reveals Correlation of Expression Patterns with the Local Temperature Profile
Source: MDPI journal article supplement (doi:10.3390/plants9111548), 2020-11-12
Supplement: s1 [file s1]

|                              |            |            |            |            |            |            |            |            |            |            |            |            |            |            |            |            |            |            |            |
|------------------------------|------------|------------|------------|------------|------------|------------|------------|------------|------------|------------|------------|------------|------------|------------|------------|------------|------------|------------|------------|
| VIT_20150011g00720-VviWRKY01 | 10         | 12         | 12         | 14         | 11         | 14         | 14         | 20         | 16         | 17         | 15         | 17         | 21         | 25         | 21         | 16         | 14         | 15         | 6          |
| VIT_20150010g03930-VviWRKY03 | 2          | 2          | 2          | 2          | 3          | 2          | 2          | 2          | 2          | 3          | 2          | 2          | 16         | 15         | 11         | 11         | 16         | 15         | 25         |
| VIT_20450008g05760-VviWRKY08 | 25         | 23         | 67         | 34         | 22         | 30         | 20         | 20         | 23         | 29         | 30         | 29         | 25         | 35         | 31         | 23         | 31         | 18         | 46         |
| VIT_20450008g06600-VviWRKY09 | 8          | 7          | 6          | 6          | 6          | 6          | 7          | 4          | 5          | 6          | 6          | 5          | 4          | 4          | 4          | 4          | 4          | 4          | 8          |
| VIT_20450069g00920-VviWRKY10 | 15         | 20         | 26         | 18         | 17         | 22         | 18         | 22         | 20         | 22         | 24         | 22         | 31         | 37         | 31         | 28         | 27         | 21         | 29         |
| VIT_20450023g00470-VviWRKY13 | 2          | 2          | 2          | 2          | 1          | 2          | 2          | 2          | 2          | 2          | 2          | 3          | 2          | 3          | 2          | 2          | 2          | 2          | 1          |
| VIT_20550077g00730-VviWRKY14 | 3          | 3          | 3          | 3          | 2          | 4          | 4          | 5          | 3          | 4          | 4          | 5          | 13         | 17         | 15         | 10         | 8          | 6          | 14         |
| VIT_20650004g00230-VviWRKY15 | 14         | 11         | 25         | 13         | 8          | 8          | 12         | 13         | 12         | 13         | 12         | 12         | 7          | 8          | 7          | 9          | 14         | 8          | 2          |
| VIT_20650004g07500-VviWRKY16 | 33         | 31         | 36         | 18         | 25         | 31         | 41         | 42         | 27         | 33         | 23         | 41         | 81         | 89         | 94         | 76         | 80         | 93         | 332        |
| VIT_20750141g00680-VviWRKY17 | 19         | 21         | 22         | 22         | 20         | 22         | 19         | 20         | 19         | 22         | 23         | 22         | 23         | 22         | 24         | 19         | 19         | 18         | 10         |
| VIT_20750005g01520-VviWRKY18 | 11         | 16         | 22         | 18         | 13         | 18         | 22         | 26         | 15         | 19         | 22         | 25         | 50         | 65         | 44         | 46         | 49         | 41         | 18         |
| VIT_20750005g01710-VviWRKY19 | 12         | 17         | 15         | 15         | 16         | 20         | 29         | 24         | 20         | 23         | 21         | 25         | 45         | 44         | 32         | 46         | 34         | 44         | 29         |
| VIT_20750005g02570-VviWRKY20 | 13         | 13         | 17         | 11         | 13         | 18         | 27         | 27         | 14         | 20         | 14         | 26         | 79         | 100        | 87         | 44         | 39         | 29         | 26         |
| VIT_20750031g00080-VviWRKY21 | 16         | 18         | 21         | 17         | 16         | 21         | 18         | 20         | 18         | 20         | 19         | 21         | 27         | 31         | 25         | 21         | 21         | 16         | 10         |
| VIT_20750031g01710-VviWRKY22 | 10         | 8          | 15         | 8          | 8          | 9          | 9          | 8          | 8          | 9          | 9          | 8          | 3          | 7          | 3          | 2          | 4          | 2          | 0          |
| VIT_20750031g01840-VviWRKY23 | 39         | 58         | 41         | 42         | 65         | 66         | 82         | 69         | 49         | 84         | 56         | 76         | 23         | 29         | 21         | 27         | 11         | 7          | 9          |
| VIT_20850058g01390-VviWRKY25 | 81         | 89         | 202        | 124        | 91         | 87         | 113        | 120        | 104        | 131        | 123        | 131        | 97         | 148        | 125        | 95         | 114        | 49         | 4          |
| VIT_20850040g03070-VviWRKY26 | 18         | 20         | 20         | 19         | 16         | 19         | 20         | 24         | 20         | 18         | 20         | 20         | 25         | 24         | 27         | 23         | 28         | 22         | 17         |
| VIT_20850007g00570-VviWRKY27 | 0          | 1          | 1          | 1          | 1          | 1          | 1          | 1          | 1          | 1          | 1          | 1          | 5          | 6          | 4          | 4          | 4          | 4          | 3          |
| VIT_20950018g00240-VviWRKY28 | 3          | 2          | 4          | 1          | 2          | 3          | 8          | 2          | 2          | 3          | 1          | 3          | 3          | 4          | 3          | 4          | 4          | 4          | 9          |
| VIT_21050116g01200-VviWRKY29 | 7          | 4          | 6          | 3          | 4          | 5          | 6          | 5          | 4          | 6          | 5          | 6          | 14         | 18         | 14         | 14         | 15         | 18         | 40         |
| VIT_21050003g01600-VviWRKY30 | 6          | 7          | 9          | 6          | 6          | 8          | 12         | 8          | 10         | 6          | 12         | 29         | 43         | 32         | 26         | 23         | 24         | 36         |            |
| VIT_21050033g02810-VviWRKY31 | 4          | 6          | 8          | 4          | 3          | 6          | 4          | 8          | 6          | 4          | 6          | 29         | 30         | 30         | 20         | 13         | 14         | 26         |            |
| VIT_21050003g05740-VviWRKY32 | 5          | 5          | 5          | 7          | 5          | 6          | 5          | 5          | 6          | 6          | 8          | 6          | 5          | 6          | 5          | 5          | 3          | 3          | 9          |
| VIT_21150037g00150-VviWRKY33 | 16         | 19         | 17         | 14         | 15         | 19         | 21         | 23         | 18         | 19         | 20         | 22         | 29         | 28         | 27         | 35         | 39         | 32         | 61         |
| VIT_21150052g00450-VviWRKY34 | 16         | 16         | 22         | 17         | 18         | 21         | 18         | 17         | 18         | 19         | 21         | 17         | 18         | 21         | 19         | 16         | 14         | 12         | 7          |
| VIT_21250028g00270-VviWRKY35 | 3          | 4          | 5          | 3          | 2          | 5          | 4          | 5          | 5          | 5          | 5          | 5          | 25         | 26         | 25         | 23         | 23         | 17         | 15         |
| VIT_21250059g00880-VviWRKY37 | 5          | 5          | 7          | 4          | 4          | 4          | 6          | 6          | 5          | 7          | 4          | 6          | 6          | 10         | 8          | 5          | 5          | 5          | 14         |
| VIT_21250057g00550-VviWRKY38 | 10         | 10         | 9          | 8          | 9          | 10         | 10         | 10         | 10         | 9          | 10         | 10         | 13         | 13         | 14         | 13         | 12         | 14         | 17         |
| VIT_21250055g00340-VviWRKY39 | 0          | 0          | 0          | 0          | 0          | 0          | 0          | 0          | 1          | 0          | 0          | 0          | 4          | 4          | 3          | 4          | 4          | 6          | 18         |
| VIT_21350067g03140-VviWRKY41 | 25         | 25         | 35         | 27         | 20         | 24         | 42         | 21         | 24         | 31         | 20         | 26         | 7          | 13         | 11         | 5          | 6          | 3          | 1          |
| VIT_21450081g00560-VviWRKY42 | 15         | 18         | 16         | 14         | 15         | 17         | 20         | 16         | 14         | 17         | 19         | 22         | 24         | 24         | 20         | 22         | 22         | 18         | 14         |
| VIT_21450108g01280-VviWRKY45 | 51         | 39         | 42         | 30         | 36         | 43         | 61         | 41         | 35         | 43         | 33         | 45         | 60         | 70         | 64         | 62         | 55         | 52         | 131        |
| VIT_21550021g01310-VviWRKY46 | 15         | 18         | 19         | 17         | 18         | 17         | 15         | 19         | 18         | 15         | 17         | 16         | 9          | 8          | 9          | 15         | 6          | 6          | 10         |
| VIT_21550046g01140-VviWRKY47 | 7          | 6          | 12         | 7          | 6          | 8          | 9          | 6          | 6          | 7          | 6          | 7          | 5          | 8          | 6          | 4          | 5          | 3          | 1          |
| VIT_21550046g02150-VviWRKY48 | 0          | 0          | 0          | 1          | 0          | 1          | 1          | 1          | 1          | 2          | 2          | 2          | 19         | 36         | 20         | 33         | 30         | 35         | 17         |
| VIT_21550040g02190-VviWRKY49 | 3          | 4          | 3          | 3          | 3          | 3          | 3          | 3          | 3          | 3          | 3          | 4          | 7          | 9          | 6          | 8          | 8          | 10         | 10         |
| VIT_21750000g01280-VviWRKY52 | 4          | 3          | 4          | 2          | 3          | 3          | 5          | 5          | 3          | 5          | 3          | 4          | 14         | 20         | 19         | 12         | 6          | 6          | 16         |
| VIT_21850001g10030-VviWRKY54 | 3          | 4          | 5          | 4          | 4          | 5          | 4          | 4          | 4          | 5          | 5          | 4          | 10         | 11         | 9          | 7          | 6          | 3          | 5          |
| VIT_21950090g00840-VviWRKY55 | 2          | 1          | 2          | 1          | 1          | 2          | 30         | 3          | 1          | 3          | 2          | 3          | 37         | 37         | 33         | 22         | 19         | 10         | 14         |
| VIT_21950090g01720-VviWRKY56 | 7          | 7          | 7          | 5          | 6          | 7          | 8          | 8          | 7          | 7          | 6          | 7          | 7          | 8          | 9          | 7          | 7          | 9          | 6          |
| VIT_21950015g01870-VviWRKY57 | 9          | 9          | 9          | 9          | 9          | 9          | 9          | 9          | 10         | 10         | 10         | 10         | 10         | 11         | 12         | 11         | 10         | 10         | 9          |
| VIT_20150011g00220-VviWRKY58 | 10         | 10         | 12         | 9          | 8          | 10         | 11         | 11         | 10         | 10         | 10         | 11         | 11         | 14         | 14         | 8          | 9          | 9          | 9          |
| VIT_20050463g00010-VviWRKY59 | 6          | 7          | 9          | 7          | 6          | 7          | 8          | 9          | 7          | 7          | 7          | 7          | 10         | 8          | 10         | 9          | 8          | 6          | 6          |
|                              | 2016-06-01 | 2016-06-02 | 2016-06-04 | 2016-06-06 | 2016-06-09 | 2016-06-12 | 2016-06-14 | 2016-06-16 | 2016-06-18 | 2016-06-21 | 2016-06-24 | 2016-06-28 | 2016-07-26 | 2016-08-04 | 2016-08-11 | 2016-08-23 | 2016-09-08 | 2016-09-22 | 2016-11-03 |
