# Supplementary material for: RNA-Seq Time Series of Vitis vinifera Bud Development Reveals Correlation of Expression Patterns with the Local Temperature Profile
Source: MDPI journal article supplement (doi:10.3390/plants9111548), 2020-11-12
Supplement: s1 [file s1]

|                            |            |            |            |            |            |            |            |            |            |            |            |            |            |            |            |            |
|----------------------------|------------|------------|------------|------------|------------|------------|------------|------------|------------|------------|------------|------------|------------|------------|------------|------------|
| VIT_2006023g00070-MYB143   | 2          | 2          | 3          | 1          | 3          | 3          | 3          | 2          | 3          | 4          | 15         | 16         | 16         | 15         | 14         | 7          |
| VIT_2005023g00170-MYB136   | 4          | 5          | 12         | 11         | 6          | 6          | 5          | 8          | 6          | 7          | 7          | 7          | 6          | 4          | 6          | 2          |
| VIT_2005043g00050-MYBPAL1  | 6          | 6          | 6          | 6          | 6          | 7          | 7          | 7          | 7          | 7          | 7          | 8          | 8          | 10         | 10         | 9          |
| VIT_2005124g00010-MYB190   | 1          | 1          | 1          | 2          | 3          | 4          | 5          | 14         | 4          | 9          | 10         | 15         | 17         | 17         | 28         | 19         |
| VIT_2005135g00010-MYB148   | 1          | 1          | 1          | 1          | 1          | 1          | 1          | 1          | 1          | 1          | 1          | 1          | 6          | 8          | 5          | 4          |
| VIT_2100011g04760-MYBC2-L1 | 15         | 24         | 25         | 28         | 19         | 18         | 13         | 30         | 29         | 19         | 23         | 20         | 43         | 51         | 49         | 26         |
| VIT_2100026g01910-MYB192   | 24         | 20         | 21         | 21         | 20         | 23         | 26         | 20         | 21         | 24         | 29         | 28         | 20         | 21         | 19         | 21         |
| VIT_2100026g02600-MYB165   | 10         | 10         | 9          | 10         | 8          | 9          | 13         | 12         | 9          | 8          | 8          | 9          | 12         | 9          | 9          | 6          |
| VIT_2100026g02710-MYB140   | 22         | 33         | 34         | 33         | 34         | 35         | 36         | 35         | 34         | 35         | 38         | 38         | 25         | 11         | 40         | 9          |
| VIT_2020012g01650-MYB178   | 0          | 0          | 0          | 0          | 0          | 0          | 0          | 0          | 0          | 0          | 0          | 4          | 5          | 4          | 4          | 1          |
| VIT_2020025g00320-MYB132   | 2          | 2          | 2          | 3          | 3          | 3          | 11         | 4          | 9          | 12         | 11         | 4          | 6          | 5          | 2          | 1          |
| VIT_2030033g02310-MYB4A    | 22         | 23         | 28         | 28         | 29         | 29         | 37         | 33         | 29         | 39         | 34         | 59         | 73         | 65         | 54         | 40         |
| VIT_2030038g02310-MYB171   | 2          | 2          | 2          | 2          | 2          | 2          | 2          | 2          | 3          | 3          | 3          | 4          | 4          | 4          | 5          | 7          |
| VIT_2040008g00620-MYB153   | 3          | 5          | 6          | 7          | 5          | 6          | 4          | 8          | 7          | 8          | 6          | 15         | 15         | 15         | 9          | 6          |
| VIT_2040008g01800-MYBPA7   | 24         | 25         | 35         | 32         | 23         | 34         | 40         | 48         | 41         | 37         | 38         | 34         | 50         | 65         | 47         | 33         |
| VIT_2040008g01810-MYBPA8   | 9          | 10         | 7          | 9          | 10         | 8          | 4          | 7          | 11         | 5          | 6          | 4          | 2          | 3          | 3          | 2          |
| VIT_2040008g01820-MYBPA9   | 2          | 2          | 2          | 2          | 2          | 1          | 2          | 1          | 2          | 2          | 1          | 1          | 1          | 1          | 1          | 2          |
| VIT_2040023g03710-MYB48    | 11         | 12         | 19         | 23         | 17         | 9          | 5          | 9          | 12         | 11         | 20         | 12         | 9          | 11         | 8          | 7          |
| VIT_2040044g01380-MYB166   | 0          | 0          | 0          | 0          | 0          | 0          | 0          | 0          | 1          | 0          | 1          | 1          | 2          | 2          | 3          | 2          |
| VIT_2050002g01100-MYB146   | 3          | 2          | 3          | 2          | 2          | 3          | 3          | 5          | 3          | 2          | 3          | 11         | 9          | 13         | 23         | 21         |
| VIT_2050044g01020-MYB15    | 2          | 2          | 3          | 1          | 2          | 1          | 5          | 2          | 1          | 5          | 2          | 1          | 5          | 4          | 4          | 5          |
| VIT_2050007g700500-MYB108A | 4          | 4          | 10         | 6          | 5          | 4          | 5          | 7          | 5          | 6          | 7          | 6          | 11         | 14         | 11         | 11         |
| VIT_2060004g00570-MYB58    | 17         | 18         | 18         | 18         | 16         | 16         | 17         | 24         | 22         | 18         | 17         | 18         | 25         | 29         | 25         | 28         |
| VIT_2060004g02110-MYB185   | 3          | 4          | 4          | 11         | 11         | 11         | 13         | 24         | 13         | 26         | 30         | 28         | 10         | 11         | 10         | 15         |
| VIT_2060004g01400-MYB187   | 4          | 2          | 2          | 0          | 0          | 0          | 0          | 2          | 3          | 5          | 3          | 7          | 5          | 8          | 5          | 4          |
| VIT_2060005g02480-MYB159   | 1          | 1          | 2          | 1          | 1          | 2          | 1          | 2          | 1          | 1          | 1          | 2          | 1          | 2          | 1          | 2          |
| VIT_2060006g010470-MYB149  | 12         | 13         | 15         | 12         | 11         | 15         | 18         | 23         | 15         | 16         | 15         | 17         | 35         | 37         | 36         | 33         |
| VIT_2070005g01210-MYB17    | 13         | 9          | 9          | 10         | 9          | 9          | 9          | 11         | 11         | 7          | 7          | 7          | 5          | 5          | 5          | 5          |
| VIT_2070005g01950-MYB108B  | 1          | 0          | 0          | 0          | 0          | 0          | 0          | 1          | 1          | 0          | 1          | 0          | 2          | 3          | 1          | 1          |
| VIT_2070005g02480-MYB55A   | 16         | 13         | 15         | 12         | 15         | 15         | 25         | 13         | 13         | 19         | 16         | 19         | 12         | 13         | 13         | 11         |
| VIT_2070005g03340-MYB14    | 1          | 1          | 1          | 1          | 1          | 1          | 1          | 1          | 0          | 1          | 1          | 1          | 9          | 7          | 10         | 15         |
| VIT_2070013g00040-MYB3     | 16         | 18         | 20         | 20         | 17         | 23         | 26         | 24         | 23         | 29         | 24         | 23         | 25         | 27         | 39         | 24         |
| VIT_2070014g01000-MYB179   | 0          | 0          | 0          | 0          | 0          | 0          | 0          | 0          | 0          | 0          | 0          | 13         | 11         | 7          | 10         | 11         |
| VIT_2080007g000410-MYB91A  | 27         | 36         | 33         | 47         | 28         | 38         | 32         | 49         | 53         | 37         | 45         | 35         | 55         | 40         | 49         | 47         |
| VIT_2080007g01540-MYB176   | 10         | 12         | 12         | 10         | 12         | 13         | 13         | 17         | 13         | 14         | 12         | 15         | 17         | 17         | 18         | 21         |
| VIT_2080009g05030-MYB150   | 3          | 4          | 3          | 6          | 3          | 4          | 4          | 7          | 5          | 4          | 5          | 4          | 11         | 17         | 18         | 6          |
| VIT_2080005g00800-MYB60    | 4          | 7          | 6          | 5          | 6          | 5          | 9          | 7          | 11         | 6          | 6          | 6          | 11         | 8          | 7          | 13         |
| VIT_2080005g001190-MYB167  | 3          | 3          | 3          | 3          | 3          | 3          | 3          | 4          | 4          | 3          | 3          | 4          | 3          | 3          | 4          | 3          |
| VIT_2090002g01380-MYBPA13  | 6          | 6          | 6          | 6          | 4          | 6          | 6          | 6          | 6          | 5          | 6          | 3          | 5          | 7          | 7          | 4          |
| VIT_2090002g01400-MYBPA6   | 2          | 2          | 2          | 3          | 2          | 2          | 2          | 4          | 3          | 3          | 4          | 3          | 4          | 2          | 5          | 3          |
| VIT_2100012g01300-MYBPA4   | 18         | 21         | 25         | 24         | 17         | 26         | 20         | 34         | 31         | 19         | 28         | 19         | 49         | 38         | 39         | 55         |
| VIT_2110001g01310-MYBPA1   | 1          | 1          | 1          | 2          | 1          | 1          | 1          | 1          | 1          | 1          | 2          | 1          | 1          | 1          | 2          | 1          |
| VIT_2110001g01320-MYBPA2   | 10         | 11         | 10         | 14         | 9          | 11         | 8          | 9          | 13         | 8          | 13         | 5          | 9          | 9          | 7          | 11         |
| VIT_2110001g02780-MYB154   | 1          | 0          | 1          | 1          | 1          | 1          | 1          | 0          | 1          | 1          | 0          | 1          | 1          | 1          | 1          | 1          |
| VIT_2120013g00400-MYB138   | 2          | 1          | 3          | 3          | 2          | 2          | 2          | 2          | 3          | 3          | 3          | 2          | 3          | 3          | 2          | 2          |
| VIT_2130001g03200-MYB177   | 5          | 6          | 6          | 4          | 5          | 6          | 6          | 7          | 5          | 5          | 5          | 6          | 9          | 9          | 10         | 8          |
| VIT_2130006g01630-MYB161   | 7          | 7          | 8          | 7          | 6          | 7          | 7          | 7          | 7          | 7          | 7          | 6          | 10         | 9          | 10         | 11         |
| VIT_2140006g01290-MYB166   | 20         | 19         | 20         | 20         | 14         | 12         | 14         | 12         | 13         | 14         | 12         | 13         | 9          | 12         | 12         | 3          |
| VIT_2140006g01340-MYB45    | 8          | 6          | 7          | 5          | 4          | 4          | 2          | 1          | 3          | 1          | 3          | 1          | 1          | 1          | 0          | 0          |
| VIT_2140006g01620-MYBC2-L3 | 1          | 1          | 1          | 3          | 2          | 1          | 1          | 2          | 2          | 2          | 3          | 1          | 2          | 2          | 1          | 2          |
| VIT_2140003g00400-MYB135   | 4          | 4          | 3          | 3          | 2          | 2          | 2          | 2          | 3          | 4          | 1          | 3          | 3          | 2          | 3          | 9          |
| VIT_2140006g002040-MYB156  | 5          | 6          | 7          | 6          | 6          | 9          | 12         | 6          | 10         | 8          | 10         | 8          | 10         | 1          | 0          | 0          |
| VIT_2140006g01220-MYB156   | 4          | 4          | 4          | 3          | 4          | 4          | 4          | 5          | 4          | 3          | 4          | 5          | 5          | 5          | 4          | 5          |
| VIT_2140008g300120-MYB91B  | 17         | 20         | 18         | 22         | 15         | 20         | 20         | 23         | 21         | 21         | 18         | 20         | 18         | 23         | 20         | 11         |
| VIT_2140018g00830-MYB308   | 17         | 14         | 17         | 16         | 11         | 15         | 22         | 28         | 18         | 18         | 16         | 18         | 25         | 20         | 10         | 16         |
| VIT_2140018g00910-MYB91B   | 1          | 1          | 1          | 2          | 1          | 1          | 2          | 1          | 1          | 1          | 1          | 2          | 2          | 1          | 3          | 3          |
| VIT_2140010g01080-MYB141   | 14         | 13         | 19         | 20         | 14         | 15         | 15         | 21         | 16         | 17         | 19         | 21         | 21         | 34         | 37         | 57         |
| VIT_2150001g00630-MYBPA9   | 64         | 91         | 112        | 136        | 80         | 88         | 67         | 98         | 91         | 171        | 90         | 139        | 163        | 96         | 101        | 282        |
| VIT_2150004g03190-MYB17A   | 1          | 1          | 1          | 1          | 1          | 1          | 2          | 1          | 2          | 2          | 2          | 2          | 4          | 3          | 6          | 5          |
| VIT_2160002g01210-MYB191   | 2          | 3          | 4          | 7          | 4          | 3          | 2          | 5          | 4          | 4          | 5          | 3          | 2          | 3          | 3          | 2          |
| VIT_2160003g01710-MYB81    | 0          | 0          | 0          | 0          | 0          | 1          | 0          | 0          | 0          | 1          | 1          | 9          | 14         | 10         | 13         | 14         |
| VIT_2160003g01920-MYB196   | 24         | 27         | 204        | 26         | 27         | 24         | 24         | 24         | 25         | 25         | 20         | 25         | 24         | 28         | 27         | 22         |
| VIT_2160005g00070-MYB178   | 3          | 4          | 4          | 5          | 3          | 4          | 4          | 6          | 4          | 5          | 4          | 5          | 10         | 11         | 12         | 21         |
| VIT_2170000g01800-MYB169   | 1          | 1          | 1          | 1          | 1          | 1          | 1          | 1          | 1          | 3          | 4          | 7          | 6          | 8          | 7          | 7          |
| VIT_2170000g02650-MYBC2-L4 | 5          | 7          | 8          | 10         | 7          | 9          | 12         | 10         | 15         | 12         | 9          | 22         | 24         | 23         | 20         | 31         |
| VIT_2170000g02660-MYBC2-L2 | 14         | 18         | 17         | 21         | 14         | 17         | 14         | 18         | 18         | 18         | 13         | 17         | 19         | 22         | 18         | 28         |
| VIT_2170000g03560-MYB164   | 5          | 6          | 6          | 4          | 3          | 4          | 5          | 7          | 4          | 4          | 4          | 17         | 19         | 16         | 18         | 14         |
| VIT_2170000g04040-MYB133   | 12         | 15         | 14         | 14         | 11         | 16         | 14         | 22         | 15         | 17         | 12         | 14         | 18         | 18         | 15         | 17         |
| VIT_2170000g06410-MYB142   | 1          | 1          | 1          | 2          | 1          | 1          | 1          | 1          | 1          | 1          | 2          | 1          | 2          | 1          | 0          | 1          |
| VIT_2170000g06480-MYB157   | 23         | 17         | 19         | 19         | 15         | 14         | 14         | 15         | 13         | 12         | 11         | 7          | 9          | 12         | 6          | 7          |
| VIT_2170000g09080-MYB147   | 12         | 11         | 8          | 9          | 13         | 13         | 17         | 22         | 13         | 19         | 16         | 23         | 7          | 8          | 9          | 13         |
| VIT_2180000g015670-MYB182  | 0          | 0          | 1          | 0          | 0          | 0          | 0          | 0          | 0          | 1          | 0          | 8          | 5          | 8          | 6          | 8          |
| VIT_2180000g108470-MYB152  | 0          | 0          | 1          | 0          | 0          | 1          | 1          | 1          | 0          | 1          | 9          | 10         | 7          | 10         | 7          | 15         |
| VIT_2180000g09850-MYB174   | 90         | 71         | 102        | 65         | 66         | 66         | 93         | 111        | 57         | 68         | 79         | 85         | 108        | 101        | 115        | 126        |
| VIT_2180000g11170-MYB175   | 6          | 4          | 6          | 8          | 4          | 4          | 8          | 7          | 4          | 5          | 7          | 6          | 10         | 12         | 10         | 14         |
| VIT_2180000g13260-MYB170   | 4          | 5          | 5          | 4          | 4          | 4          | 5          | 1          | 5          | 1          | 5          | 4          | 5          | 4          | 5          | 6          |
| VIT_2190001g03820-MYB145   | 4          | 6          | 8          | 5          | 4          | 9          | 7          | 9          | 6          | 9          | 8          | 10         | 56         | 63         | 59         | 33         |
| VIT_2190001g01280-MYB80    | 1          | 1          | 1          | 0          | 0          | 1          | 1          | 1          | 1          | 1          | 1          | 1          | 1          | 2          | 1          | 1          |
| VIT_2190008g050050-MYB139  | 1          | 1          | 3          | 4          | 1          | 1          | 2          | 2          | 2          | 2          | 2          | 2          | 15         | 13         | 14         | 14         |
| VIT_2190008g050940-MYB678  | 1          | 3          | 4          | 4          | 2          | 3          | 3          | 3          | 3          | 3          | 3          | 3          | 10         | 12         | 11         | 12         |
| 2016-06-01                 | 2016-06-02 | 2016-06-03 | 2016-06-04 | 2016-06-05 | 2016-06-06 | 2016-06-07 | 2016-06-08 | 2016-06-09 | 2016-06-10 | 2016-06-11 | 2016-06-12 | 2016-06-13 | 2016-06-14 | 2016-06-15 | 2016-06-16 | 2016-06-17 |
| 2016-06-18                 | 2016-06-19 | 2016-06-20 | 2016-06-21 | 2016-06-22 | 2016-06-23 | 2016-06-24 | 2016-06-25 | 2016-06-26 | 2016-06-27 | 2016-06-28 | 2016-06-29 | 2016-06-30 | 2016-07-01 | 2016-07-02 | 2016-07-03 | 2016-07-04 |
