# Supplementary material for: RNA-Seq Time Series of Vitis vinifera Bud Development Reveals Correlation of Expression Patterns with the Local Temperature Profile
Source: MDPI journal article supplement (doi:10.3390/plants9111548), 2020-11-12
Supplement: s1 [file s1]

|                                |            |            |            |            |            |            |            |            |            |            |            |            |            |            |            |            |            |            |    |
|--------------------------------|------------|------------|------------|------------|------------|------------|------------|------------|------------|------------|------------|------------|------------|------------|------------|------------|------------|------------|----|
| VIT_20050211g00140-VviAGL17d   | 2          | 1          | 2          | 2          | 2          | 2          | 2          | 3          | 2          | 2          | 3          | 3          | 9          | 4          | 8          | 12         | 16         | 11         | 10 |
| VIT_20050211g00180-VviAGL17c   | 1          | 1          | 1          | 1          | 1          | 1          | 1          | 2          | 1          | 1          | 2          | 1          | 5          | 3          | 4          | 5          | 8          | 5          | 4  |
| VIT_20050313g00070-VviSVP1     | 33         | 34         | 38         | 37         | 28         | 36         | 34         | 38         | 35         | 33         | 36         | 31         | 40         | 33         | 42         | 33         | 43         | 48         | 31 |
| VIT_20150011g00100-VviAP1      | 0          | 0          | 0          | 0          | 0          | 1          | 0          | 1          | 0          | 0          | 1          | 1          | 11         | 4          | 13         | 7          | 12         | 18         | 11 |
| VIT_20150011g00110-VviSEP4     | 1          | 1          | 0          | 1          | 1          | 1          | 2          | 1          | 1          | 2          | 2          | 2          | 1          | 1          | 1          | 1          | 1          | 1          | 0  |
| VIT_20250023g04650-VviSOC1c    | 27         | 28         | 27         | 20         | 25         | 24         | 23         | 23         | 24         | 19         | 18         | 22         | 12         | 13         | 14         | 10         | 8          | 10         | 12 |
| VIT_20350017g00360-VviSVP4     | 11         | 9          | 10         | 11         | 9          | 9          | 7          | 7          | 8          | 7          | 9          | 7          | 5          | 4          | 5          | 4          | 3          | 3          | 1  |
| VIT_20350017g00440-VviSVPS1    | 21         | 19         | 24         | 23         | 18         | 21         | 16         | 20         | 18         | 18         | 22         | 18         | 17         | 15         | 16         | 21         | 18         | 11         | 11 |
| VIT_20350097g00160-VviAGL17b   | 3          | 3          | 3          | 3          | 3          | 2          | 4          | 2          | 2          | 3          | 1          | 3          | 5          | 4          | 5          | 6          | 9          | 8          | 6  |
| VIT_20350167g00070-VviSVP5     | 14         | 15         | 17         | 16         | 14         | 14         | 15         | 17         | 16         | 13         | 18         | 14         | 21         | 17         | 22         | 22         | 31         | 19         | 14 |
| VIT_20450008g01980-VviMADSD2a  | 3          | 2          | 4          | 5          | 4          | 3          | 3          | 2          | 4          | 2          | 4          | 1          | 0          | 1          | 0          | 0          | 0          | 0          | 0  |
| VIT_21450068g01800-VviFLC2     | 14         | 14         | 18         | 12         | 10         | 13         | 14         | 20         | 13         | 13         | 9          | 14         | 43         | 41         | 46         | 53         | 57         | 116        | 71 |
| VIT_21450083g01030-VviFUL2     | 0          | 0          | 0          | 1          | 0          | 1          | 1          | 0          | 0          | 1          | 1          | 1          | 2          | 1          | 2          | 1          | 2          | 2          | 2  |
| VIT_21550024g01860-VviSVPS4    | 3          | 3          | 3          | 3          | 2          | 3          | 4          | 3          | 3          | 2          | 3          | 2          | 2          | 1          | 2          | 2          | 2          | 1          | 1  |
| VIT_21550048g01250-VviSOC1a    | 53         | 49         | 66         | 48         | 45         | 45         | 42         | 49         | 45         | 42         | 47         | 42         | 37         | 47         | 43         | 27         | 28         | 33         | 12 |
| VIT_21550107g00120-VviSVP3     | 16         | 14         | 21         | 21         | 13         | 14         | 16         | 15         | 15         | 12         | 18         | 12         | 19         | 14         | 17         | 18         | 28         | 13         | 12 |
| VIT_21650022g02330-VviAGL6b    | 0          | 1          | 0          | 0          | 0          | 0          | 1          | 0          | 0          | 0          | 0          | 1          | 4          | 1          | 3          | 3          | 4          | 4          | 3  |
| VIT_21650022g02380-VviSOC1b    | 18         | 18         | 19         | 17         | 13         | 16         | 16         | 17         | 15         | 15         | 17         | 13         | 18         | 21         | 20         | 15         | 20         | 25         | 13 |
| VIT_21750000g01230-VviTM8a     | 19         | 24         | 16         | 21         | 39         | 40         | 38         | 40         | 31         | 58         | 55         | 69         | 18         | 34         | 10         | 25         | 11         | 2          | 5  |
| VIT_21750000g04990-VviFUL1     | 20         | 21         | 19         | 17         | 20         | 23         | 31         | 24         | 24         | 27         | 28         | 28         | 22         | 26         | 25         | 20         | 14         | 17         | 21 |
| VIT_21750000g06340-VviMADSD2b  | 9          | 10         | 11         | 10         | 9          | 10         | 11         | 14         | 11         | 10         | 13         | 11         | 20         | 16         | 17         | 25         | 26         | 17         | 22 |
| VIT_21850001g07460-VviSVP2     | 24         | 20         | 25         | 25         | 22         | 19         | 20         | 15         | 18         | 18         | 20         | 16         | 21         | 21         | 19         | 22         | 18         | 17         | 17 |
| VIT_21850001g07900-VviAGL17a   | 3          | 2          | 3          | 3          | 3          | 3          | 3          | 2          | 2          | 3          | 3          | 3          | 4          | 4          | 4          | 6          | 10         | 6          | 4  |
| VIT_21850001g09540-VviMADSD1c  | 0          | 0          | 0          | 0          | 0          | 0          | 0          | 0          | 0          | 0          | 0          | 0          | 1          | 0          | 1          | 1          | 1          | 2          | 10 |
| VIT_21850001g13460-VviAP3a     | 1          | 1          | 1          | 1          | 1          | 1          | 1          | 1          | 1          | 1          | 1          | 1          | 1          | 1          | 1          | 1          | 2          | 2          | 0  |
| VIT_21850041g02140-VviAGL12    | 3          | 2          | 3          | 2          | 2          | 2          | 2          | 3          | 3          | 3          | 3          | 2          | 5          | 5          | 4          | 4          | 3          | 1          | 0  |
| VIT_23050000g00009-VviFLC1     | 6          | 6          | 7          | 7          | 4          | 6          | 6          | 8          | 6          | 6          | 7          | 9          | 7          | 5          | 7          | 10         | 7          | 12         | 24 |
| VIT_23050000g00011-VviMADS1A2d | 6          | 6          | 4          | 5          | 6          | 5          | 4          | 3          | 6          | 6          | 4          | 4          | 0          | 2          | 1          | 1          | 0          | 0          | 0  |
| 2015-06-01                     | 2015-06-02 | 2015-06-04 | 2015-06-06 | 2015-06-09 | 2015-06-12 | 2015-06-14 | 2015-06-16 | 2015-06-18 | 2015-06-21 | 2015-06-24 | 2015-06-28 | 2015-07-26 | 2015-08-04 | 2015-08-11 | 2015-08-23 | 2015-09-08 | 2015-09-22 | 2015-11-03 |    |
